# Supplementary material for: Organic rectifying junctions from an electron-accepting molecular wire and an electron-donating phthalocyanine
Source: Royal Society of Chemistry journal article supplement (doi:10.1039/b600617e), 2006-01-01
Supplement: b600617e.pdf [file b600617e.pdf]

ESI for:

## Organic rectifying junctions from an electron-accepting molecular wire and an electron-donating phthalocyanine

Geoffrey J. Ashwell,\* Wayne D. Tyrrell, Barbara Urasinska, Changsheng Wang and Martin R. Bryce\*

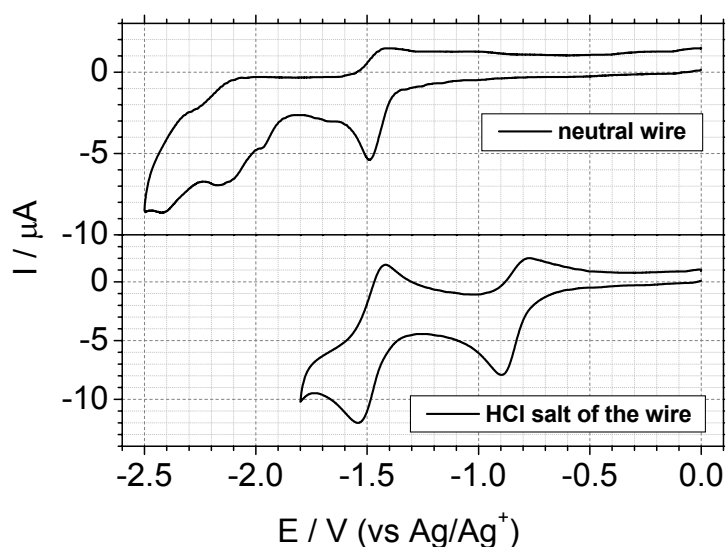

**Fig. 1** Cyclic voltammograms of the neutral molecular wire and its HCl salt, the CV measurements being performed on anhydrous DMF solutions containing 0.1 M tetrabutylammonium hexafluorophosphate, using a Pt disk ( $\Phi = 1.6$  mm) working electrode, a Pt wire counter electrode, an  $Ag/AgNO_3$  non-aqueous (acetonitrile) reference electrode, and scanned at 100 mV/sec.

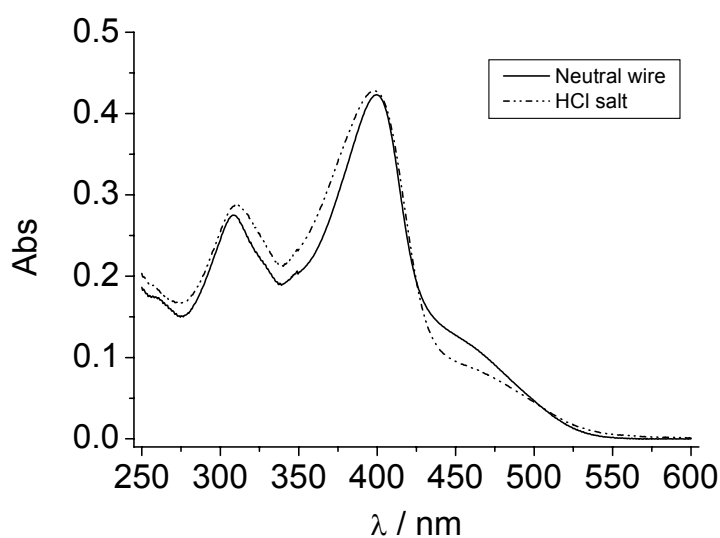

**Fig. 2** UV-Vis absorption spectra of the neutral molecular wire and its HCl salt in chloroform solution.

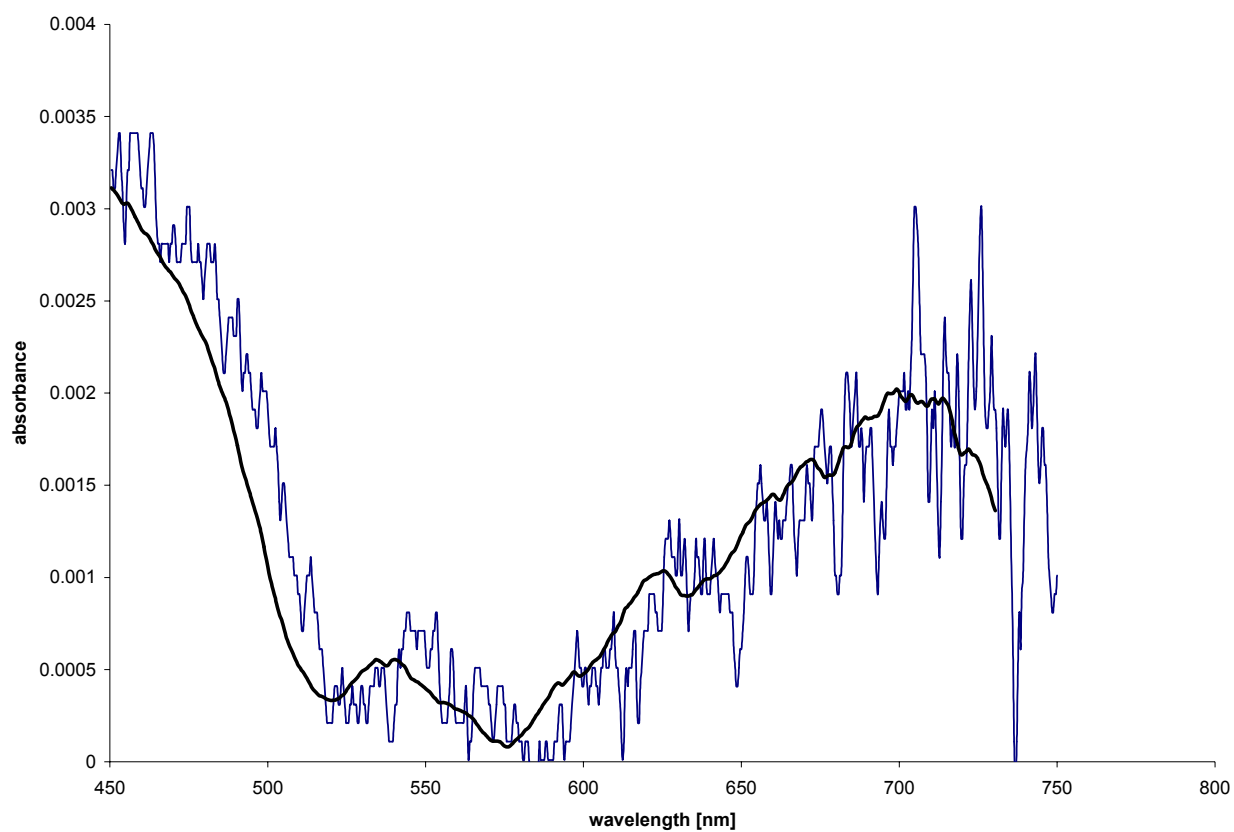

**Fig. 3** Visible absorption spectrum of the rectifying structure on a platinum coated glass substrate, the absorbance of the latter being subtracted to reveal the phthalocyanine Q-band at *ca.* 700 nm and the main transition of the protonated wire with  $\lambda_{\text{max}} < 450$  nm.
